# Supplementary material for: Quantifying ice loss in the eastern Himalayas since 1974 using declassified spy satellite imagery
Source: Copernicus journal article supplement (doi:10.5194/tc-2016-48), 2016-04-07
Supplement: Supplementary file 1 [file tc-2016-48-supplement.pdf]

Supplement

Table S1. Vertical accuracy statistics<sup>a</sup> of Hexagon DEMs relative to the 2006 ASTER DEM (meters)

| ID | Lon   | Lat <sup>b</sup> | RMSE <sub>z</sub> | Mean | Median | NMAD <sup>c</sup> | STD  | 68.3%Q | 95%Q | i <sub>h</sub> <sup>d</sup> |
|----|-------|------------------|-------------------|------|--------|-------------------|------|--------|------|-----------------------------|
| 1  | 90.05 | 28.25            | 8.1               | 0.5  | 0.7    | 6.4               | 8.1  | 6.8    | 15.9 | 0.9                         |
| 2  | 90.26 | 28.24            | 8.6               | 1.2  | 1.3    | 7.3               | 8.5  | 7.5    | 15.6 | 0.4                         |
| 3  | 89.97 | 28.09            | 11.5              | 1.4  | 1.4    | 8.7               | 11.5 | 9.4    | 22.5 | 1.8                         |
| 4  | 90.12 | 28.10            | 11.6              | 0.7  | 0.8    | 9.2               | 11.6 | 9.8    | 21.9 | 0.2                         |
| 5  | 90.27 | 28.08            | 12.8              | 0.6  | 1.0    | 8.7               | 12.8 | 9.4    | 24.4 | 1.4                         |
| 6  | 90.42 | 28.14            | 14.9              | 1.6  | 1.5    | 11.6              | 14.8 | 12.7   | 30.3 | 1.4                         |
| 7  | 90.73 | 28.05            | 8.9               | 0.1  | 0.6    | 6.6               | 8.9  | 7.0    | 17.8 | 0.6                         |
| 8  | 90.66 | 28.25            | 11.8              | 0.4  | 1.1    | 8.9               | 11.8 | 9.5    | 22.5 | 0.4                         |

<sup>a</sup> Over assumed stable terrain (i.e. excluding glaciers). <sup>b</sup> Center of each Hexagon DEM region.

<sup>c</sup> Normalized median absolute deviation. <sup>d</sup> Hole interpolation max area (km<sup>2</sup>).

5

Table S2. Glacier Change Statistics

| Glacier ID                      | a            | b            | c            | d            | e            | f            | g            |
|---------------------------------|--------------|--------------|--------------|--------------|--------------|--------------|--------------|
| Longitude (deg)                 | 89.99        | 90.04        | 90.25        | 89.99        | 90.07        | 90.15        | 90.21        |
| Latitude (deg)                  | 28.21        | 28.18        | 28.19        | 28.16        | 28.14        | 28.16        | 28.13        |
| Mean Elevation (m)              | 5728         | 5729         | 6184         | 5175         | 5061         | 4971         | 5613         |
| 1974 Area (km <sup>2</sup> )    | 14           | 31           | 88           | 30           | 13           | 35           | 9            |
| $\Delta V$ (km <sup>3</sup> )   | -0.06 ± 0.02 | -0.25 ± 0.15 | -0.05 ± 0.51 | -0.19 ± 0.18 | -0.11 ± 0.11 | -0.13 ± 0.24 | -0.04 ± 0.08 |
| $\Delta V_d$ (km <sup>3</sup> ) | -0.07 ± 0.02 | -0.27 ± 0.03 | -0.19 ± 0.04 | -0.11 ± 0.03 | -0.09 ± 0.03 | -0.06 ± 0.04 | -0.02 ± 0.02 |
| $\bar{h}$ (m)                   | -4.2 ± 1.8   | -8.2 ± 4.9   | -0.6 ± 5.8   | -6.3 ± 6.0   | -8.4 ± 8.1   | -3.8 ± 6.8   | -4.1 ± 8.4   |
| b' (m.w.e.)                     | -3.6 ± 1.5   | -7.0 ± 4.2   | -0.5 ± 4.9   | -5.3 ± 5.1   | -7.1 ± 6.9   | -3.2 ± 5.8   | -3.5 ± 7.2   |
| Area Captured (%)               | 37           | 44           | 29           | 35           | 54           | 47           | 34           |
| Debris Area (% total)           | 1            | 6            | 3            | 41           | 37           | 44           | 16           |
| Calving (y/n)                   | n            | y            | n            | n            | n            | n            | y            |

  

|  | h            | i            | j            | k            | l            | m            | n            |
|--|--------------|--------------|--------------|--------------|--------------|--------------|--------------|
|  | 90.27        | 90.32        | 90.35        | 90.39        | 90.47        | 90.7         | 90.75        |
|  | 28.13        | 28.11        | 28.09        | 28.10        | 28.08        | 28.06        | 28.04        |
|  | 5487         | 5171         | 5286         | 5800         | 6161         | 5507         | 5474         |
|  | 14           | 6            | 7            | 57           | 32           | 6            | 10           |
|  | -0.12 ± 0.15 | -0.12 ± 0.02 | -0.07 ± 0.02 | -0.41 ± 0.14 | -0.02 ± 0.19 | -0.03 ± 0.01 | -0.10 ± 0.02 |
|  | -0.12 ± 0.02 | -0.10 ± 0.02 | -0.04 ± 0.02 | -0.43 ± 0.06 | -0.05 ± 0.04 | -0.02 ± 0.01 | -0.09 ± 0.02 |

|             |             |            |            |            |            |             |
|-------------|-------------|------------|------------|------------|------------|-------------|
| -8.9 ± 11.0 | -20.2 ± 5.2 | -9.4 ± 8.7 | -7.2 ± 2.4 | -0.5 ± 6.0 | -5.0 ± 2.0 | -11.1 ± 2.6 |
| -7.5 ± 9.4  | -17.2 ± 4.6 | -8.0 ± 7.4 | -6.1 ± 2.1 | -0.5 ± 5.1 | -4.3 ± 1.7 | -9.4 ± 2.3  |
| 36          | 80          | 53         | 38         | 27         | 31         | 48          |
| 17          | 11          | 10         | 11         | 14         | < 1        | 1           |
| y           | y           | n          | n          | n          | n          | y           |

| <b>o</b>     | <b>p</b>     | <b>q</b>     | <b>r</b>     | <b>s</b>     | <b>t</b>     | <b>u</b>     |
|--------------|--------------|--------------|--------------|--------------|--------------|--------------|
| 90.79        | 90.78        | 90.62        | 90.66        | 90.68        | 90.63        | 90.67        |
| 28.03        | 28.06        | 28.21        | 28.24        | 28.26        | 28.25        | 28.29        |
| 5247         | 5544         | 5677         | 5189         | 5324         | 6141         | 5638         |
| 6            | 9            | 4            | 13           | 7            | 12           | 12           |
| -0.06 ± 0.01 | -0.11 ± 0.03 | -0.03 ± 0.05 | -0.07 ± 0.06 | -0.02 ± 0.02 | -0.01 ± 0.06 | -0.05 ± 0.03 |
| -0.03 ± 0.01 | -0.08 ± 0.02 | -0.03 ± 0.02 | -0.06 ± 0.03 | -0.01 ± 0.02 | -0.02 ± 0.02 | -0.04 ± 0.03 |
| -9.1 ± 2.2   | -12.2 ± 3.3  | -7.5 ± 11.6  | -5.2 ± 4.4   | -3.2 ± 3.4   | -0.5 ± 4.8   | -3.9 ± 2.4   |
| -7.7 ± 2.0   | -10.3 ± 2.9  | -6.3 ± 9.8   | -4.5 ± 3.8   | -2.7 ± 2.9   | -0.4 ± 4.1   | -3.3 ± 2.1   |
| 49           | 54           | 60           | 77           | 79           | 43           | 60           |
| 8            | 1            | 42           | 39           | 1            | 19           | 9            |
| n            | y            | n            | n            | n            | n            | n            |

$\Delta V$  is ice volume change after extrapolation (using regional glacier profile means to fill missing data),  $\Delta V_d$  is ice volume change without extrapolation (volume change measured directly from the elevation change maps only),  $\bar{h}$  is the spatially-averaged elevation change of the glacier (after extrapolation), and  $\dot{b}$  is the geodetic mass balance for each glacier over the 32-year timespan (after extrapolation).

5

Table S3

|                 | Excluding glacier c                  |                           |    |                                 |    | Including glacier c                  |                           |    |                                 |    |
|-----------------|--------------------------------------|---------------------------|----|---------------------------------|----|--------------------------------------|---------------------------|----|---------------------------------|----|
|                 | <b>b'</b><br>m.w.e. yr <sup>-1</sup> | Area<br>km <sup>2</sup> % |    | $\Delta V$<br>km <sup>3</sup> % |    | <b>b'</b><br>m.w.e. yr <sup>-1</sup> | Area<br>km <sup>2</sup> % |    | $\Delta V$<br>km <sup>3</sup> % |    |
| <b>clean</b>    | -0.12 ± 0.06                         | 152 ± 15                  | 47 | -0.71 ± 0.33                    | 36 | -0.09 ± 0.08                         | 240 ± 24                  | 58 | -0.76 ± 0.60                    | 38 |
| <b>debris</b>   | -0.15 ± 0.11                         | 96 ± 10                   | 29 | -0.53 ± 0.40                    | 27 | -0.15 ± 0.11                         | 96 ± 10                   | 23 | -0.53 ± 0.40                    | 26 |
| <b>calving</b>  | -0.25 ± 0.10                         | 79 ± 8                    | 24 | -0.74 ± 0.28                    | 37 | -0.25 ± 0.10                         | 79 ± 8                    | 19 | -0.74 ± 0.28                    | 36 |
| <b>combined</b> | -0.16 ± 0.05                         | 327 ± 32                  |    | -1.98 ± 0.58                    |    | -0.13 ± 0.05                         | 415 ± 41                  |    | -2.03 ± 0.77                    |    |

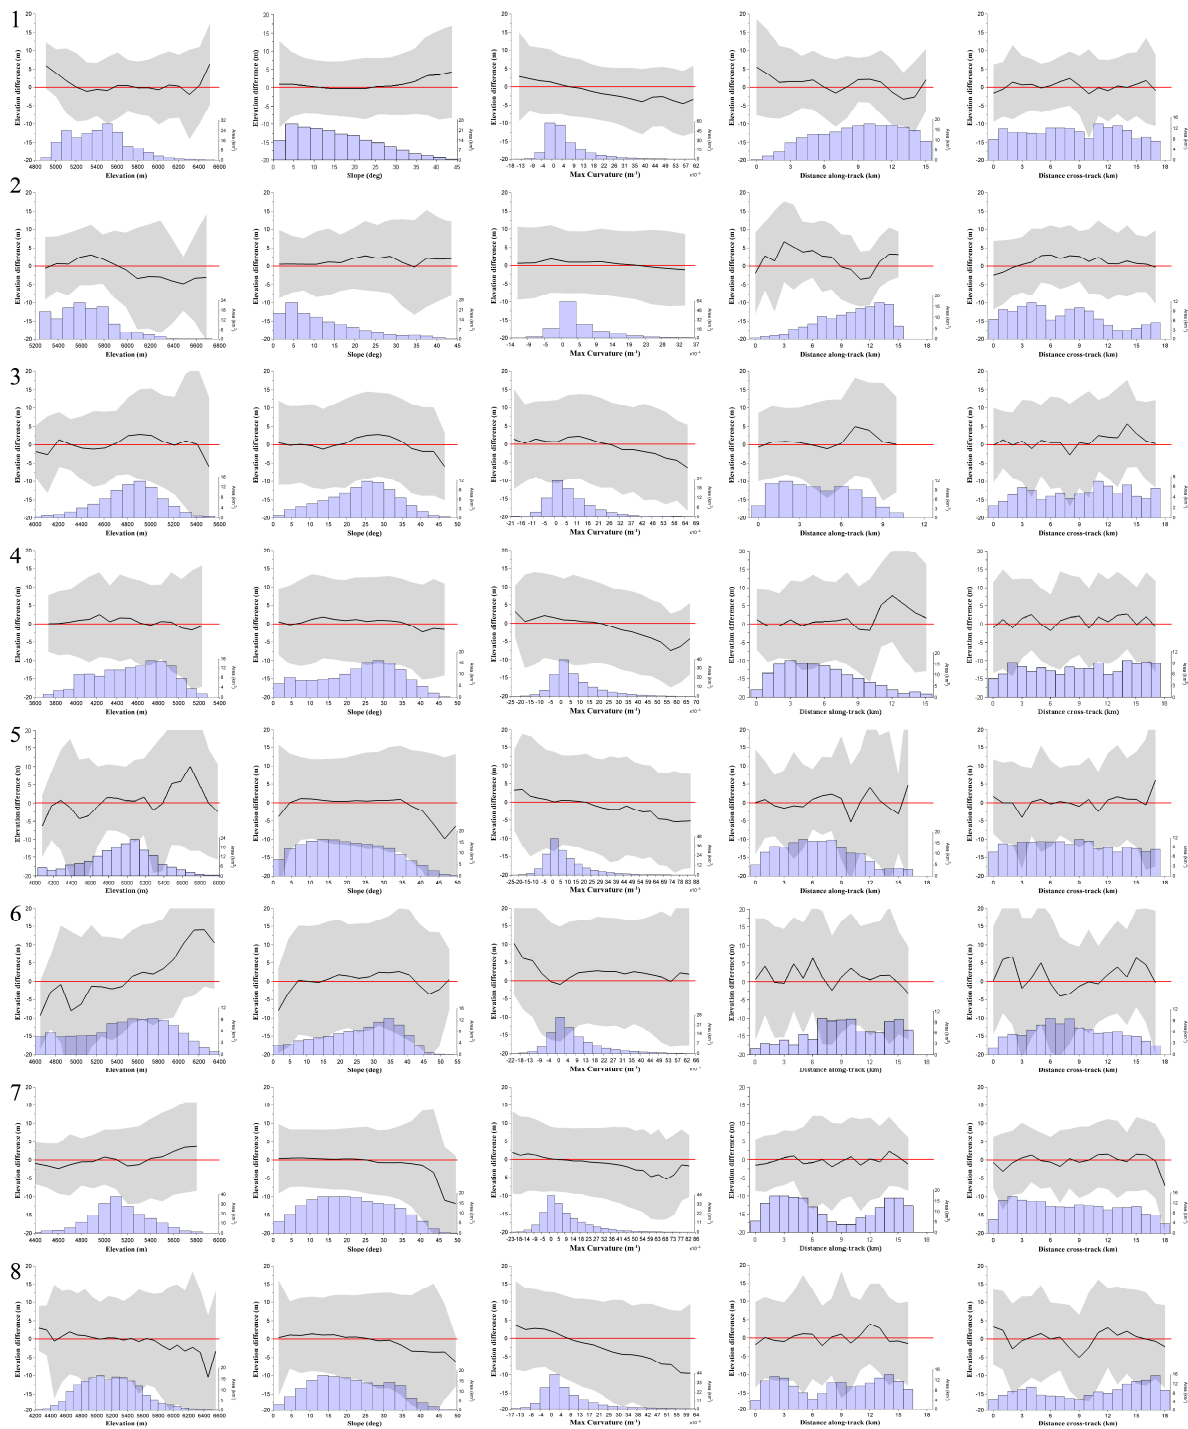

Figure S1. Plots of elevation change vs. elevation, slope, maximum curvature, and ASTER along-track and cross-track directions for assumed stable terrain in each of the 8 Hexagon DEM regions given in Table S1. Black curves and grey shaded regions indicate the mean and standard deviation of each bin, respectively. The area (km<sup>2</sup>) contained in each bin is indicated by the blue histogram bars, calculated as the number of pixels per bin \* pixel resolution<sup>2</sup>.

5
